# Supplementary material for: Identification of a set of endogenous reference genes for miRNA expression studies in Parkinson’s disease blood samples
Source: PubMed Central journal article supplement (PMC4209045; doi:10.1186/1756-0500-7-715), 2014-10-10
Supplement: 13104_2014_3248_MOESM1_ESM.pdf [file 13104_2014_3248_MOESM1_ESM.pdf]

**SUPPLEMENTARY TABLES AND FIGURES**

**Table S1. Correlation matrix of reference genes expression.** Spearman correlation coefficients were calculated; p values are reported in parenthesis.

|                    | <b>Z30</b>       | <b>RNU24</b>     | <b>RNU6B</b>    | <b>miR-103a-3p</b> |
|--------------------|------------------|------------------|-----------------|--------------------|
| <b>Z30</b>         | 1                |                  |                 |                    |
| <b>RNU24</b>       | 0.8004 (<0.0001) | 1                |                 |                    |
| <b>RNU6B</b>       | 0.1221 (0.0528)  | 0.2504 (0.0001)  | 1               |                    |
| <b>miR-103a-3p</b> | 0.6619 (<0.0001) | 0.6520 (<0.0001) | 0.0179 (0.7780) | 1                  |

**Figure S1. M stability values of gene combinations.** Dot plot showing the M stability values computed for each combination of the analysed reference genes using geNorm. miR103 is an abbreviation for miR-103a-3p.

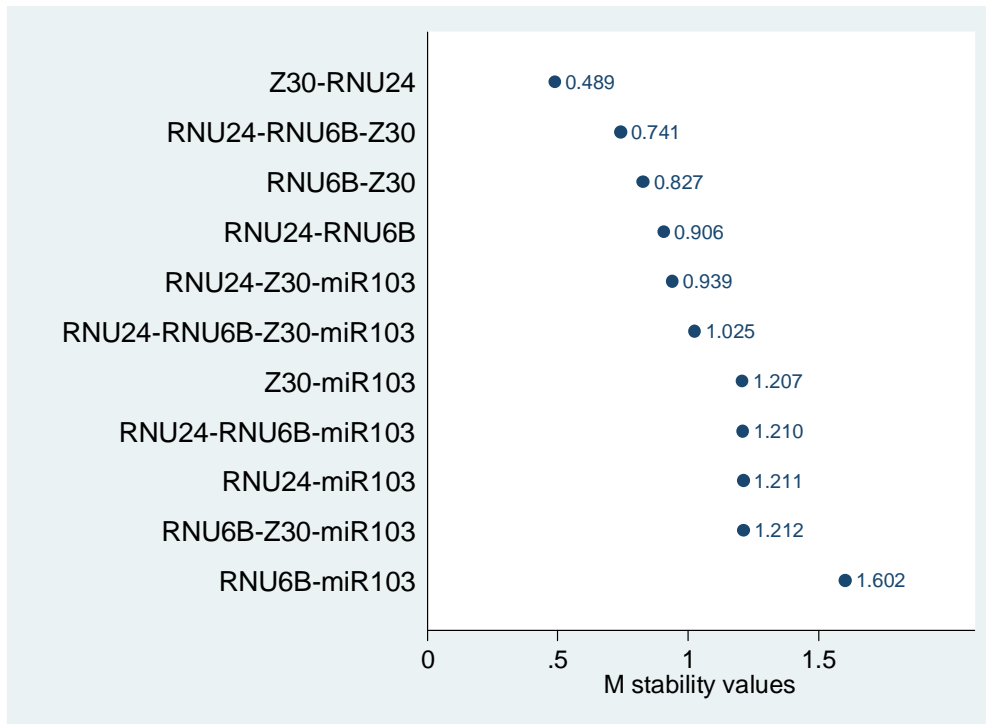

**Figure S2. Scatter plots of the expression levels in candidate reference genes.** Data plotted are Ct values of the reference genes. miR103 is an abbreviation for miR-103a-3p.

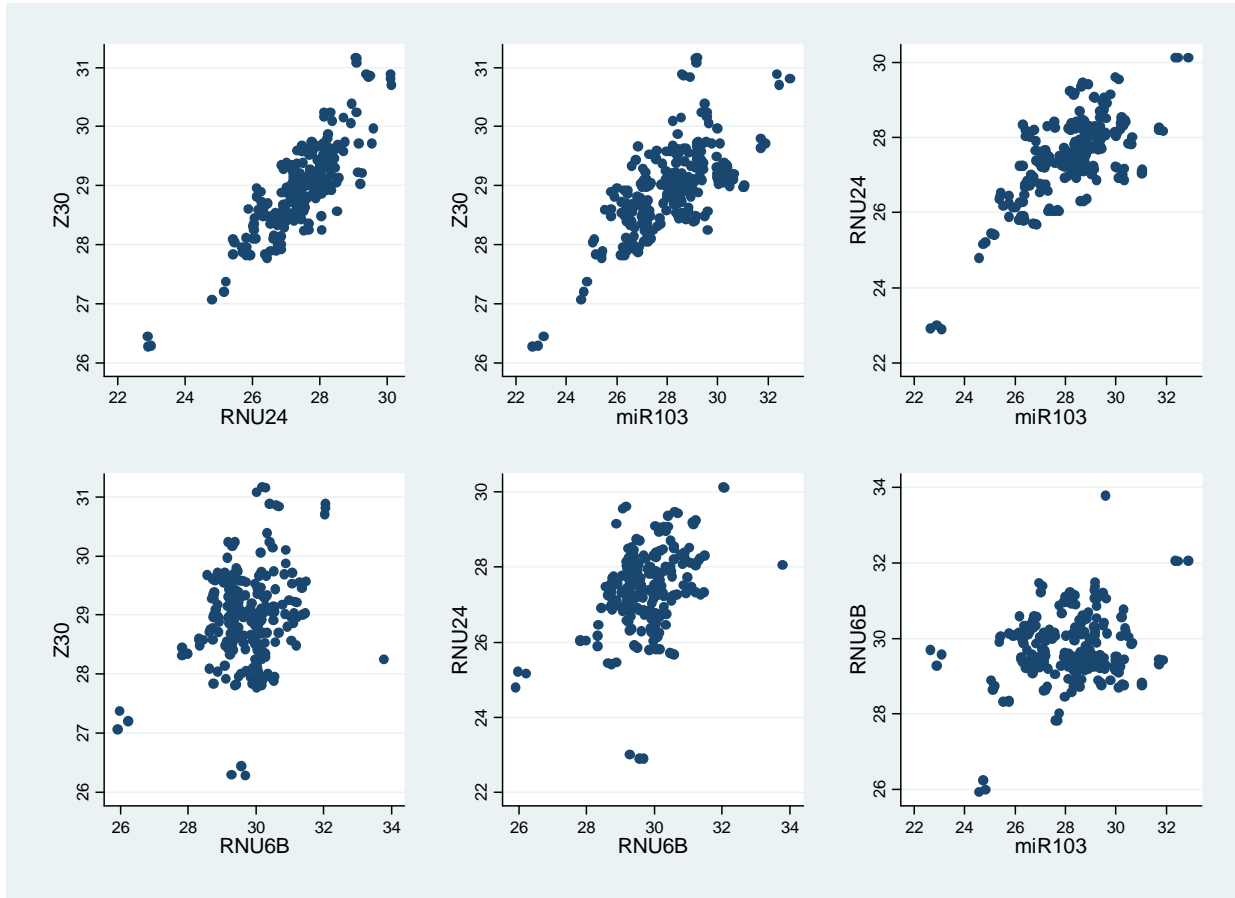

**Table S2. Correlation of miR29a relative expression levels using different reference genes.** Spearman correlation coefficients were computed. All p values are <0.001. Abbreviations: miR103 = miR-103a-3p, miR-29a = miR-29a-3p.

| TARGET: miR-29a    | Z30    | RNU24  | RNU6B  | miR103 | RNU24-RNU6B | RNU24-miR103 | RNU24-RNU6B-miR103 | RNU24-RNU6B-Z30 | RNU24-Z30-miR103 | RNU24-RNU6B-miR103 | RNU6B-Z30 | RNU6B-Z30-miR103 | Z30-miR103 | Z30-RNU24 | ALL |
|--------------------|--------|--------|--------|--------|-------------|--------------|--------------------|-----------------|------------------|--------------------|-----------|------------------|------------|-----------|-----|
| Z30                | 1      |        |        |        |             |              |                    |                 |                  |                    |           |                  |            |           |     |
| RNU24              | 0.8452 | 1      |        |        |             |              |                    |                 |                  |                    |           |                  |            |           |     |
| RNU6B              | 0.8209 | 0.7773 | 1      |        |             |              |                    |                 |                  |                    |           |                  |            |           |     |
| miR103             | 0.3882 | 0.4237 | 0.3207 | 1      |             |              |                    |                 |                  |                    |           |                  |            |           |     |
| RNU24-RNU6B        | 0.88   | 0.9031 | 0.9612 | 0.3808 | 1           |              |                    |                 |                  |                    |           |                  |            |           |     |
| RNU24-miR103       | 0.6717 | 0.7757 | 0.5927 | 0.8763 | 0.6994      | 1            |                    |                 |                  |                    |           |                  |            |           |     |
| RNU24-RNU6B-miR103 | 0.8412 | 0.8706 | 0.8796 | 0.643  | 0.936       | 0.8755       | 1                  |                 |                  |                    |           |                  |            |           |     |
| RNU24-RNU6B-Z30    | 0.9435 | 0.9065 | 0.9399 | 0.3857 | 0.9849      | 0.7031       | 0.9269             | 1               |                  |                    |           |                  |            |           |     |
| RNU24-Z30-miR103   | 0.8838 | 0.8774 | 0.7437 | 0.7113 | 0.8445      | 0.9249       | 0.9408             | 0.8778          | 1                |                    |           |                  |            |           |     |
| RNU24-RNU6B-miR103 | 0.7637 | 0.7423 | 0.844  | 0.7268 | 0.858       | 0.873        | 0.9664             | 0.8469          | 0.8959           | 1                  |           |                  |            |           |     |
| RNU6B-Z30          | 0.9374 | 0.8444 | 0.9626 | 0.3611 | 0.9695      | 0.6563       | 0.9039             | 0.987           | 0.8398           | 0.8477             | 1         |                  |            |           |     |
| RNU6B-Z30-miR103   | 0.9034 | 0.8367 | 0.8919 | 0.6053 | 0.9251      | 0.8282       | 0.9716             | 0.944           | 0.9411           | 0.9513             | 0.9402    | 1                |            |           |     |
| Z30-miR103         | 0.8154 | 0.7336 | 0.647  | 0.8173 | 0.7275      | 0.9272       | 0.8815             | 0.7734          | 0.9623           | 0.892              | 0.752     | 0.8994           | 1          |           |     |
| Z30-RNU24          | 0.971  | 0.939  | 0.8365 | 0.4052 | 0.9288      | 0.7335       | 0.8905             | 0.9686          | 0.9145           | 0.7864             | 0.9365    | 0.9121           | 0.8123     | 1         |     |
| ALL                | 0.9158 | 0.8984 | 0.8872 | 0.5784 | 0.949       | 0.8404       | 0.9808             | 0.9634          | 0.9581           | 0.9288             | 0.9421    | 0.9865           | 0.8892     | 0.9471    | 1   |

**Table S3. Correlation of miR30b relative expression levels using different reference genes.** Spearman correlation coefficients were computed. Some p values are specified in parenthesis, all remaining p values are <0.001. Abbreviations: miR103 = miR-103a-3p, miR-30b = miR-30b-5p.

| TARGET: miR-30b    | Z30               | RNU24             | RNU6B              | miR103             | RNU24-RNU6B | RNU24-miR103 | RNU24-RNU6B-miR103 | RNU24-RNU6B-Z30 | RNU24-Z30-miR103 | RNU24-RNU6B-miR103 | RNU6B-Z30 | RNU6B-Z30-miR103 | Z30-miR103 | Z30-RNU24 | ALL |
|--------------------|-------------------|-------------------|--------------------|--------------------|-------------|--------------|--------------------|-----------------|------------------|--------------------|-----------|------------------|------------|-----------|-----|
| Z30                | 1                 |                   |                    |                    |             |              |                    |                 |                  |                    |           |                  |            |           |     |
| RNU24              | 0.8057            | 1                 |                    |                    |             |              |                    |                 |                  |                    |           |                  |            |           |     |
| RNU6B              | 0.7946            | 0.7219            | 1                  |                    |             |              |                    |                 |                  |                    |           |                  |            |           |     |
| miR103             | 0.242<br>(0.0328) | 0.331<br>(0.0031) | 0.1711<br>(0.1341) | 1                  |             |              |                    |                 |                  |                    |           |                  |            |           |     |
| RNU24-RNU6B        | 0.8706            | 0.8774            | 0.9588             | 0.2301<br>(0.0427) | 1           |              |                    |                 |                  |                    |           |                  |            |           |     |
| RNU24-miR103       | 0.8051            | 0.8366            | 0.8451             | 0.5731             | 0.9036      | 1            |                    |                 |                  |                    |           |                  |            |           |     |
| RNU24-RNU6B-miR103 | 0.591             | 0.7328            | 0.4793             | 0.8487             | 0.6006      | 0.8431       | 1                  |                 |                  |                    |           |                  |            |           |     |
| RNU24-RNU6B-Z30    | 0.9301            | 0.8854            | 0.93               | 0.2307             | 0.9864      | 0.8931       | 0.6094             | 1               |                  |                    |           |                  |            |           |     |
| RNU24-Z30-miR103   | 0.8224            | 0.8304            | 0.6594             | 0.6707             | 0.7757      | 0.9296       | 0.9275             | 0.8078          | 1                |                    |           |                  |            |           |     |
| RNU24-RNU6B-miR103 | 0.7269            | 0.6703            | 0.8193             | 0.6306             | 0.8194      | 0.9595       | 0.8125             | 0.8024          | 0.8787           | 1                  |           |                  |            |           |     |
| RNU6B-Z30          | 0.9317            | 0.8008            | 0.9527             | 0.2073             | 0.9688      | 0.8695       | 0.5551             | 0.9837          | 0.7699           | 0.8152             | 1         |                  |            |           |     |
| RNU6B-Z30-miR103   | 0.8734            | 0.7661            | 0.8573             | 0.5304             | 0.8879      | 0.9671       | 0.7895             | 0.9016          | 0.9227           | 0.9634             | 0.9105    | 1                |            |           |     |
| Z30-miR103         | 0.7645            | 0.6856            | 0.5763             | 0.7559             | 0.6638      | 0.8744       | 0.9199             | 0.7042          | 0.9677           | 0.8752             | 0.6936    | 0.8984           | 1          |           |     |
| Z30-RNU24          | 0.9509            | 0.9366            | 0.8009             | 0.2987             | 0.9211      | 0.8679       | 0.688              | 0.9574          | 0.8737           | 0.7421             | 0.9149    | 0.8692           | 0.7693     | 1         |     |
| ALL                | 0.8907            | 0.8588            | 0.868              | 0.4891             | 0.932       | 0.9815       | 0.7963             | 0.9433          | 0.9331           | 0.9293             | 0.9258    | 0.9814           | 0.8732     | 0.9259    | 1   |
